# Supplementary material for: Adaptive tourism forecasting using hybrid artificial intelligence model: a case study of Xi’an international tourist arrivals
Source: PeerJ Comput Sci. 2023 Nov 30;9:e1573. doi: 10.7717/peerj-cs.1573 (PMC10703057; doi:10.7717/peerj-cs.1573)
Supplement: Supplemental Information 1 [file peerj-cs-09-1573-s001.xlsx]

## Sheet: Sheet1
Year	Arrivals	ARIMA	GM	Rolling GM
1980	4	0	4	*
1981	6.71	5.96169	18.8783	*
1982	9.09	8.86911	19.9826	*
1983	12.38	10.9658	21.1514	*
1984	15.13	14.7451	22.3886	*
1985	21.15	18.1596	23.6982	*
1986	25.78	25.4004	25.0844	*
1987	30.15	28.9807	26.5517	*
1988	36.58	32.9797	28.1047	*
1989	21.2	37.7535	29.7487	*
1990	25.88	30.7686	31.4888	*
1991	31	33.7954	33.3306	*
1992	40.16	40.069	35.2802	37.7488
1993	43.5	50.96	37.3439	41.6996
1994	41.49	39.2897	39.5282	45.4826
1995	41.35	40.4286	41.8404	46.507
1996	45.39	42.5667	44.2877	46.4247
1997	48.53	51.3096	46.8782	48.3533
1998	47.98	55.4938	49.6203	51.3559
1999	55.41	52.8622	52.5227	53.5545
2000	65.03	55.5005	55.5949	59.5972
2001	67.2	63.516	58.8469	65.0038
2002	74.13	66.6505	62.289	69.502
2003	33.66	67.8831	65.9324	75.8495
2004	65.03	51.2122	69.789	62.5407
2005	77.56	71.4882	73.8712	65.8581
2006	86.73	83.9156	78.1921	72.8215
2007	100.01	95.9961	82.7658	81.6323
2008	63.2	66.7559	87.6071	94.7916
2009	67.29	70.3614	92.7314	86.5959
2010	84.18	77.5788	98.1556	81.0347
2011	100.23	95.087	103.897	83.7447
2012	115.35	117.923	109.974	93.9377
2013	121.11	95.5114	116.407	109.383
2014	124.23	96.7528	123.216	125.578
2015	110.72	104.449	130.423	135.112
2016	133.88	121.063	138.052	145.371
2017	175.13	136.759	146.127	156.409
2018	202.75	127.19	154.675	168.284
